# Supplementary material for: Evaluating the Efficacy of ChatGPT in Generating Assessment and Plans for Medical Notes in Urology
Source: Research Square preprint supplement (doi:10.21203/rs.3.rs-5427610/v1), 2024-12-19
Supplement: Supplementary file 1 [file 8a355efeb6938b95a88f2c73.docx]

**Supplementary Content 1:**

**ChatGPT Prompt**

You are writing medical notes as a urologist. As a urologist, you must write an Assessment and Plan for a patient based on their medical history and information. Your Assessment should begin with a one-sentence problem statement that includes relevant medical history and a clear summary of the issue. Following this, discuss the most likely diagnosis and differential diagnoses, along with your reasoning. These should all fall under the same heading of "Assessment."

The "Plan" section should be problem-oriented, structured in a way that addresses each problem (not each potential diagnosis) individually and presents diagnostic/treatment options in bullet-point format. Include specific medications with frequency and dosages when appropriate. Omit all irrelevant non-urologic problems from the plan. For relevant non-urologic problems, simply recommend follow-up with PCP.

Your writing style should be concise but comprehensive, intended to be medical documentation. You do not need to explain or define acronyms. Abbreviations and sentence fragments are acceptable. The entire "Assessment" section should be written in paragraph format with no bullet points. Only the "Plan" section should contain bullet points.
